# Supplementary material for: Current Transition Practice for Primary Immunodeficiencies and Autoinflammatory Diseases in Europe: a RITA-ERN Survey
Source: PubMed Central journal article supplement (PMC9840587; doi:10.1007/s10875-022-01345-y), 2022-10-12

# Transition within Immunology Services

Please answer every question as best as possible. The questionnaire needs to be completed and submitted in one sitting. Thank you.

1. Email address \*

---

## Centre Details

2. Hospital:

---

3. City:

---

4. Country:

---

5. Lead clinician:

---

6. Referral base (tick all that apply):

*Check all that apply.*

- Local
- Regional
- National
- Unknown
- Other: 

---

7. Are you completing this for: (If both, please fill in a separate questionnaire for each, and indicate your response for the current questionnaire. To access an additional copy of the form, click the link in the original email for a second time once you have submitted the current one.)

*Mark only one oval.*

- Primary Immunodeficiency Disease
- Autoinflammatory Disorders

**8. What number of paediatric patients with this condition are cared for at your centre?***Mark only one oval.*

- <50
- 50-100
- 100-200
- 200-500
- >500
- Unknown

**9. What number of patients aged 12-18 with this condition are cared for at your centre?***Mark only one oval.*

- <50
- 50-100
- >200
- Unknown

**10. What number of patients do you transfer to adult services each year?***Mark only one oval.*

- <5
- 5-10
- 10-20
- 20-40
- >40
- Unknown

## Transition Process

**11. Where do you refer paediatric patients for adult care?***Check all that apply.*

- Specialist adult PID/autoinflammatory centre
- General adult rheumatology clinic
- Adult internal medicine physician
- General practitioner
- Discharge without specific follow up
- Other adult clinic
- Unknown

**12. Do you have formal transition partner(s)?***Mark only one oval.*

- Yes
- No

**13. What proportion of your patients transition to your formal transition partner?**

Mark only one oval.

- >75%
- 50-75%
- 25-50%
- <25%
- Unknown
- Not applicable

**14. Do you have a defined process for transition?**

Mark only one oval.

- Yes
- No

**15. Do you have national disease-specific guidelines for transition?**

Mark only one oval.

- Yes
- No

**16. Do you follow these at your centre?**

Mark only one oval.

- Yes
- No
- Partially

**17. Does your transition program include patients who have had Hematopoietic Stem Cell Transplantation in childhood?**

Mark only one oval.

- Yes
- No
- Not yet (future aspiration)

**18. Who chooses the adult centre? (tick all that apply, eg where decision is a consensus)**

Check all that apply.

- The medical team
- The parents
- The patient
- No choice: there is only one centre available
- Funder (eg health insurance)
- Unknown
- Not applicable

**19. What influences your choice of adult centre? (tick all that apply)***Check all that apply.*

- Expertise of the adult team
- Other services available at that centre
- Local location for the patient
- Professional connection with the adult team
- Funding options
- Unknown
- Not applicable

**20. Compared to the paediatric centre, is the adult centre usually:***Mark only one oval.*

- Further from the patient's home
- Similar distance from the patient's home
- Nearer to the patient's home
- Variable for each patient
- Unknown
- Not applicable

**21. Do you have difficulty identifying a specialist centre for adult care?***Mark only one oval.*

- Yes
- No

**22. If yes, what are the reasons? (tick all that apply)***Check all that apply.*

- Lack of specialist adult centres
- Lack of engagement from existing/specialist adult services
- Distance for the patient to travel to a specialist centre
- Lack of funding for follow up of adult patients
- Unknown
- Not applicable
- Other: \_\_\_\_\_

**If a transition program is in place:**

**23. What median age does this start at?***Mark only one oval.*

- 10-12  
 12-14  
 14-16  
 16-18  
 18 or over  
 Unknown  
 Not applicable

**24. What median age does this end at?***Mark only one oval.*

- 10-12  
 12-14  
 14-16  
 16-18  
 18-20  
 >20  
 Unknown  
 Not applicable

**25. At what age do you transfer to the adult centre?***Mark only one oval.*

- 12-14  
 14-16  
 16-18  
 18-20  
 >20  
 Unknown  
 Not applicable

**26. What material/program do you use?**

---

---

---

---

---

**27. What factors influence age of transfer? (tick all that apply)***Check all that apply.*

- End of transition program
- Patient considered to be ready for transition
- Medically stable
- Age of the patient
- Paediatric centre can no longer offer care
- Unknown
- Not applicable
- Other: \_\_\_\_\_

**28. Are patients transitioned to intermediate adolescent services prior to moving to the adult service?***Mark only one oval.*

- Yes
- No

**29. Do you have joint clinics with the adult team prior to transfer to adult care?***Mark only one oval.*

- Yes
- No

**30. If yes, how many joint appointments occur per patient?**

---

**31. Do you have the ability for virtual joint clinics between paediatric and adult teams?***Mark only one oval.*

- Yes
- No

**32. If yes, please give further details:**

---

---

---

---

---

**33. Does the adult centre have a designated young adult clinic?***Mark only one oval.*

- Yes
- No

**34. What professionals are involved in the transition process? (tick all that apply)***Check all that apply.*

- Paediatric physician
- Adult physician
- Nurse
- Psychologist
- Youth Worker
- Social Worker
- Pharmacist
- Specialists from other medical teams
- Unknown
- Not applicable
- Other

**35. If 'specialists from other medical teams' or 'other', please specify here:**


---



---



---



---



---

**36. What professionals are involved in the transfer appointment? (tick all that apply)***Check all that apply.*

- Paediatric physician
- Adult physician
- Nurse
- Psychologist
- Youth worker
- Social worker
- Pharmacist
- Specialists from other medical teams
- Other
- Unknown
- Not applicable

**37. If 'specialists from other medical teams' or 'other', please specify here:**


---



---



---



---



---

**38. What information is transitioned to the adult team? (tick all that apply)**

*Check all that apply.*

- Transition letter
- Full medical history including co-morbidities
- Imaging files
- Relevant test results (eg blood/lung function)
- Vaccination history
- Details of conditioning and donor if HSCT
- Genetic report
- Family pedigree
- Psychological well-being/mental health
- Learning disability/educational needs
- Education/occupation plan
- Social work involvement
- Medication details
- Specific issues about procedure fears (eg needlephobia)
- Unknown
- Not applicable
- Other: \_\_\_\_\_

**39. Is there full integration of records between paediatric and adult services (eg electronic case record)?**

*Mark only one oval.*

- Yes
- No

**40. Do you have dedicated administrative time (e.g. a secretary) to prepare transition documents?**

*Mark only one oval.*

- Yes
- No



**41. Prior to transfer do you specifically discuss the following with the patient? (tick all that apply)**

*Check all that apply.*

- Understanding of disease
- Genetic basis and heritability
- Fertility and parenthood (if previous HSCT)
- Contraception and sexual health
- Substance use (alcohol/drugs)
- Understanding of current medications
- Compliance with current treatment regimen
- Preference for transition centre
- Expectations of adult services
- Patient responsibility for own health care
- Mental health and well-being
- Vocational expectations (work and education planning)
- Life expectancy
- Health insurance
- Unknown
- Not applicable

**42. What, in your opinion, are the main weaknesses of your transition program? (tick all that apply)**

*Check all that apply.*

- Lack of suitable centres to transition to
- My patients do not want to engage
- I do not have engagement from the paediatric team
- I do not have engagement from the adult team
- I do not have time to prepare the documentation
- Medication that the patient is receiving is not available in the adult centre
- Lack of resource and funding for transition within the adult service
- Fragmentation of services in adult centres
- Lack of holistic care at the paediatric centre (eg psychology)
- Lack of holistic care at the adult centre (eg psychology)
- Unknown
- Not applicable
- Other: \_\_\_\_\_

**43. Do you have keep a database of transitioned patients?**

*Mark only one oval.*

- Yes
- No

**44. Do you have any transition-specific research program in your department?**

*Mark only one oval.*

Yes

No

Powered by

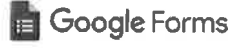

Supplement: 10875_2022_1345_MOESM2_ESM.pdf [file 10875_2022_1345_MOESM2_ESM.pdf]
